# Supplementary material for: In Vivo Imaging of Hypoxia and Neoangiogenesis in Experimental Syngeneic Hepatocellular Carcinoma Tumor Model Using Positron Emission Tomography
Source: Hindawi journal article supplement (doi:10.1155/2020/4952372), 2020-01-01
Supplement: f1 [file 4952372.f1.zip]

## Supplementary Material

### Supplementary data 1:

#### 1. Radiopharmaceuticals

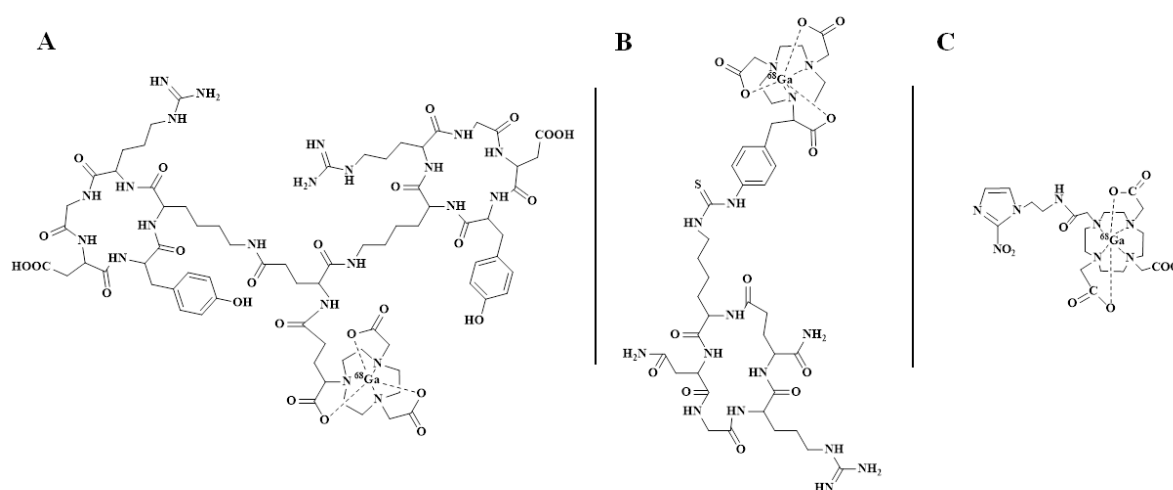

**Figure. 1** Chemical structures of  $^{68}\text{Ga}$ -NODAGA-[c(RGD)]<sub>2</sub> (A),  $^{68}\text{Ga}$ -NOTA-c(NGR) (B) and  $^{68}\text{Ga}$ -DOTA-Nitroimidazole (C).

### Supplementary data 2:

#### 2. *In vivo* blocking experiments

The APN/CD13 specificity of  $^{68}\text{Ga}$ -NOTA-c(NGR) was confirmed by blocking experiments using *in vivo* PET imaging studies (Supplementary Material, Fig. 2). He/De tumor bearing rats were injected with 200  $\mu\text{g}$  unlabelled NOTA-c(NGR) (approx. 100-fold of the radiolabelled peptide) prior to  $^{68}\text{Ga}$ -NOTA-c(NGR) injection. The accumulation of  $^{68}\text{Ga}$ -NOTA-c(NGR) in He/De tumors decreased after the administration of unlabelled NOTA-c(NGR) (Fig. 2B). Quantitative SUV data analysis showed that significantly ( $p \leq 0.01$ ) lower SUVmean ( $0.04 \pm 0.01$ ), SUVmax ( $0.05 \pm 0.01$ ), T/M SUVmean ( $2.14 \pm 0.89$ ) and T/M SUVmax ( $3.45 \pm 1.11$ ) values were observed using the unlabelled NOTA-c(NGR) than that of the absence of the cold material, where the T/M SUVmean and T/M SUVmax values of He/De tumors were  $11.23 \pm 1.15$ .

and  $12.62 \pm 1.44$ , respectively (Fig. 2C and D). These results verified the APN/CD13 specificity of  $^{68}\text{Ga}$ -NOTA-c(NGR).

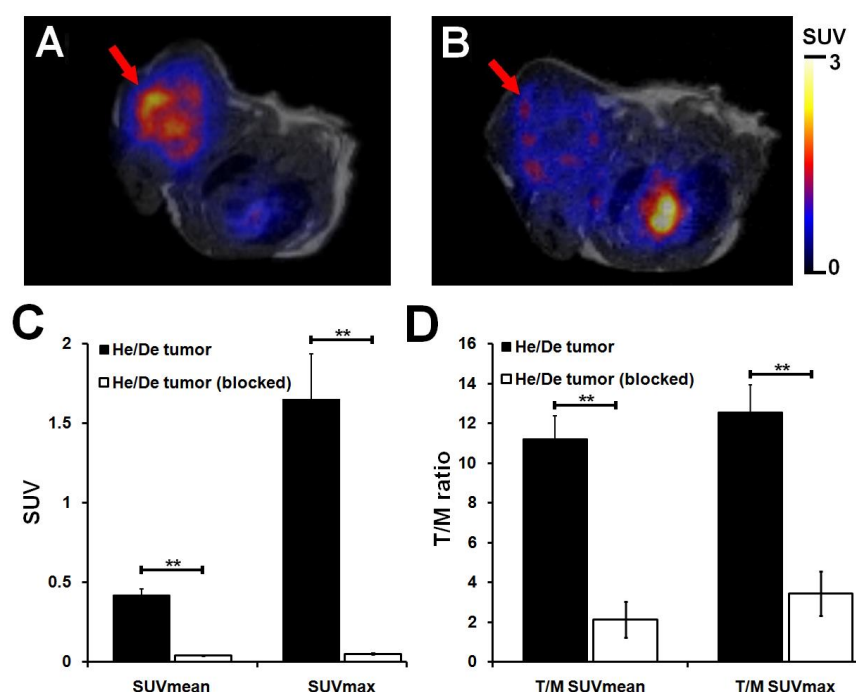

**Figure 2.** Representative decay-corrected axial PET/MRI images of subcutaneously transplanted He/De tumors (red arrows) 90 min after intravenous injection of  $^{68}\text{Ga}$ -NOTA-c(NGR). A: basic, B: blocked with unlabelled NOTA-c(NGR); C and D: quantitative SUV analysis of  $^{68}\text{Ga}$ -NOTA-c(NGR) accumulation in He/De tumors (n=10/group). T/M: tumor-to-muscle ratio. Significance level:  $p \leq 0.01$  (\*\*). Data is presented as mean  $\pm$  SD.

### Supplementary data 3:

#### 3. *Ex vivo* biodistribution studies

For *ex vivo* biodistribution studies approx. 10 MBq of  $^{68}\text{Ga}$ -NOTA-c(NGR),  $^{68}\text{Ga}$ -DOTA-Nitroimidazole or  $^{68}\text{Ga}$ -NODAGA-[c(RGD)]<sub>2</sub> was injected via the lateral tail vein into He/De tumor-bearing rats and, after 90 min incubation time rats were euthanized with 5% Forane. The weight and the radioactivities of the whole tumors and tissue samples (muscle as background) were measured with calibrated gamma counter and the uptake was expressed as %ID/g tissue. Table 1 shows an increasing radiotracer uptake in dynamically growing He/De tumors using all

of the three radiotracers. In blocking experiments, the %ID values of  $^{68}\text{Ga}$ -NOTA-c(NGR) significantly ( $p \leq 0.01$ ) decreased in He/De tumors by using unlabelled NOTA-c(NGR). This observation signed that the tracer uptake of the tumor was blocked efficiently, confirming the CD13 binding specificity of  $^{68}\text{Ga}$ -NOTA-c(NGR).

**Table 1**

*Ex vivo* biodistribution (%ID/g) of  $^{68}\text{Ga}$ -NOTA-c(NGR),  $^{68}\text{Ga}$ -DOTA-Nitroimidazole and  $^{68}\text{Ga}$ -NODAGA-[c(RGD)]<sub>2</sub> in He/De tumors 90 min after tracer injection and 9±1, 12±1, and 15±1 days after subcutaneous tumor induction. Significance level between blocked and non-blocked He/De tumors at 90 min:  $p \leq 0.01$  (\*\*). 200 µg unlabelled NOTA-c(NGR) was used for blocking. T/M: tumor-to-muscle ratio.

| <b>Tumor</b>                    | <b><math>^{68}\text{Ga}</math>-NOTA-c(NGR)<br/>(n=3)</b> | <b><math>^{68}\text{Ga}</math>-DOTA-Nitroimidazole<br/>(n=3)</b> | <b><math>^{68}\text{Ga}</math>-NODAGA-[c(RGD)]<sub>2</sub><br/>(n=3)</b> |
|---------------------------------|----------------------------------------------------------|------------------------------------------------------------------|--------------------------------------------------------------------------|
| He/De (small tumor, 9±1 days)   | 0.10 ± 0.01                                              | 0.12 ± 0.05                                                      | 0.09 ± 0.01                                                              |
| He/De (medium tumor, 12±1 days) | 0.23 ± 0.09                                              | 0.21 ± 0.06                                                      | 0.16 ± 0.03                                                              |
| He/De (large tumor, 15±1 days)  | 0.41 ± 0.08**                                            | 0.28 ± 0.04                                                      | 0.31 ± 0.05                                                              |
| He/De blocked (15±1 days)       | 0.09 ± 0.03                                              | -                                                                | -                                                                        |
| T/M ratio (15±1 days)           | 9.15 ± 1.02                                              | 5.69 ± 0.40                                                      | 5.35 ± 0.89                                                              |
